# Supplementary material for: Climate in Africa sequentially shapes spring passage of Willow Warbler Phylloscopus trochilus across the Baltic coast
Source: PeerJ journal article supplement (doi:10.7717/peerj.12964), 2022-02-18
Supplement: RemisiewiczUnderhill_Suppl1_R3_Figs_S1S5_Tabs_S1S16.pdf [file RemisiewiczUnderhill_Suppl1_R3_Figs_S1S5_Tabs_S1S16.pdf]

**Climate in Africa sequentially shapes spring passage of Willow Warbler *Phylloscopus trochilus* across the Baltic coast**

**Supplementary Information**  
**Figures S1–S5 and Tables S1–S16**

Magdalena Remisiewicz<sup>1,2</sup>, Les G. Underhill<sup>2,3</sup>

<sup>1</sup> Bird Migration Research Station, Faculty of Biology, University of Gdańsk, Wita Stwosza 59, 80-308, Gdańsk, Poland; <https://orcid.org/0000-0002-3613-5738>;

Email address: [magdalena.remisiewicz@ug.edu.pl](mailto:magdalena.remisiewicz@ug.edu.pl)

<sup>2</sup> Department of Biological Sciences, University of Cape Town, Rondebosch, 7701, South Africa; <https://orcid.org/0000-0002-8758-1527>

<sup>3</sup> Biodiversity and Development Institute, 25 Old Farm Road, Rondebosch, 7700, Cape Town 7475, South Africa

Email address: [les.underhill@uct.ac.za](mailto:les.underhill@uct.ac.za)

Corresponding Author:

Magdalena Remisiewicz

Email address: [magdalena.remisiewicz@ug.edu.pl](mailto:magdalena.remisiewicz@ug.edu.pl)

**Figure S1. Cumulative count of Willow Warblers for each spring in 1982–2017 and the multiyear average cumulative count.** The area between the two curves reflects the overall Annual Anomaly for a season (see Remisiewicz & Underhill, 2020). The vertical lines divide each AA into three main periods: MP1 (1–26 April), MP2 (27 April–5 May), MP3 (6–15 May), which sum up to overall AA.

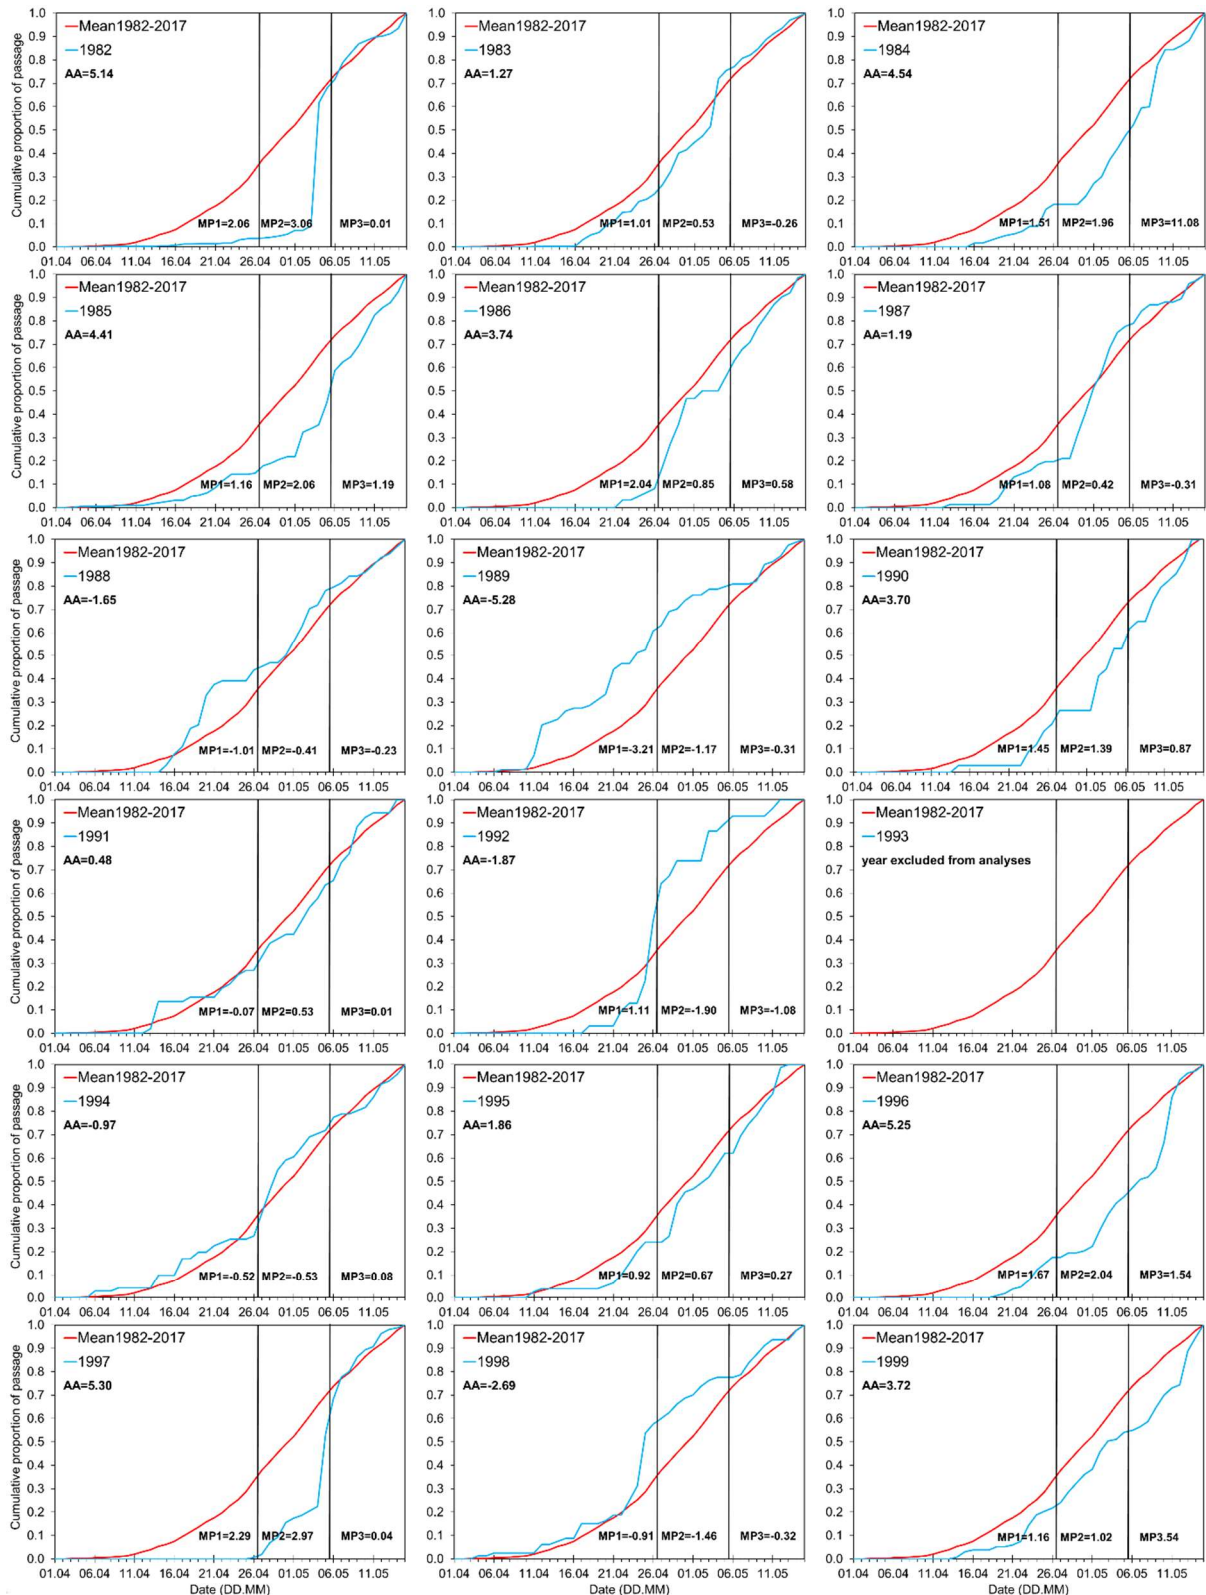

Figure S1 continued.

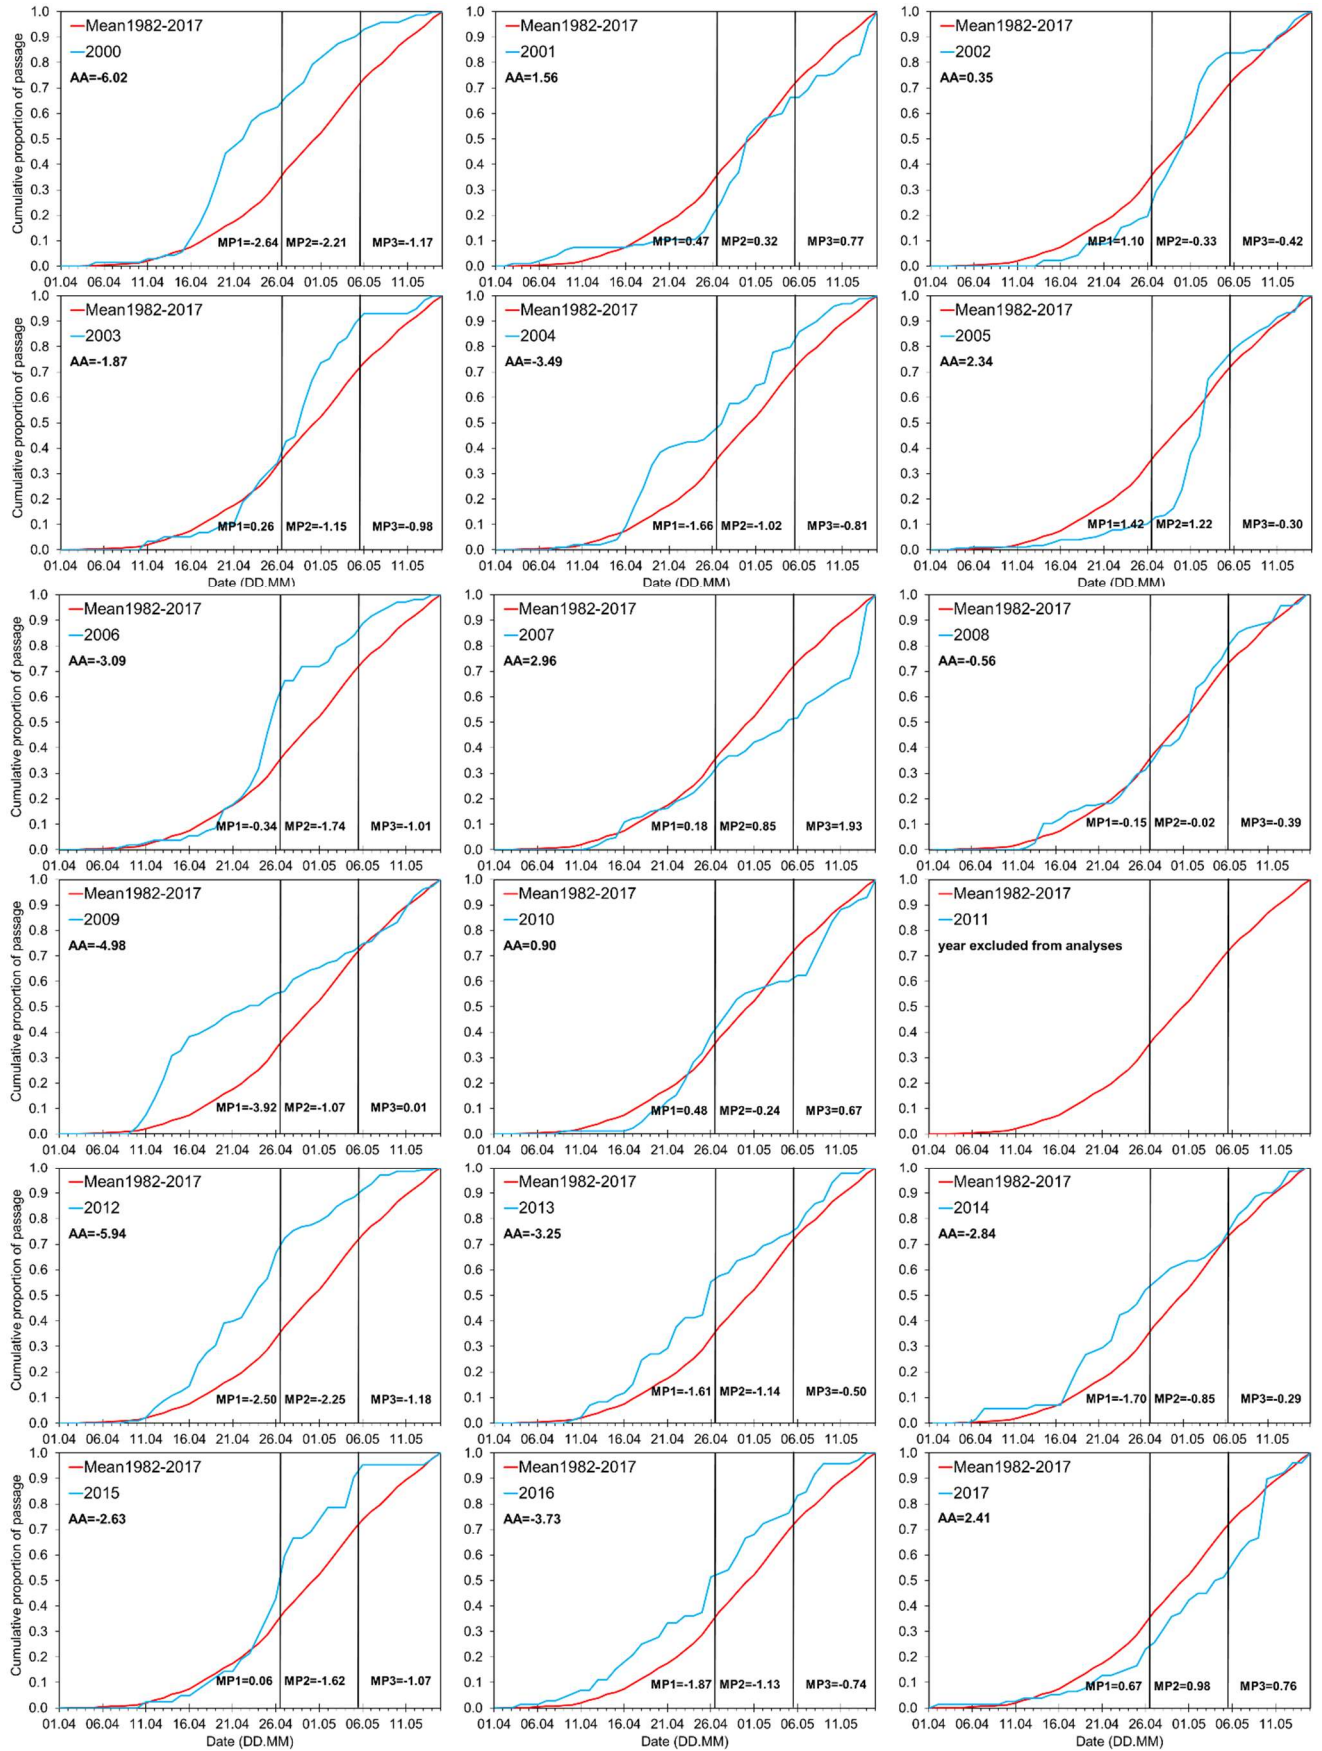

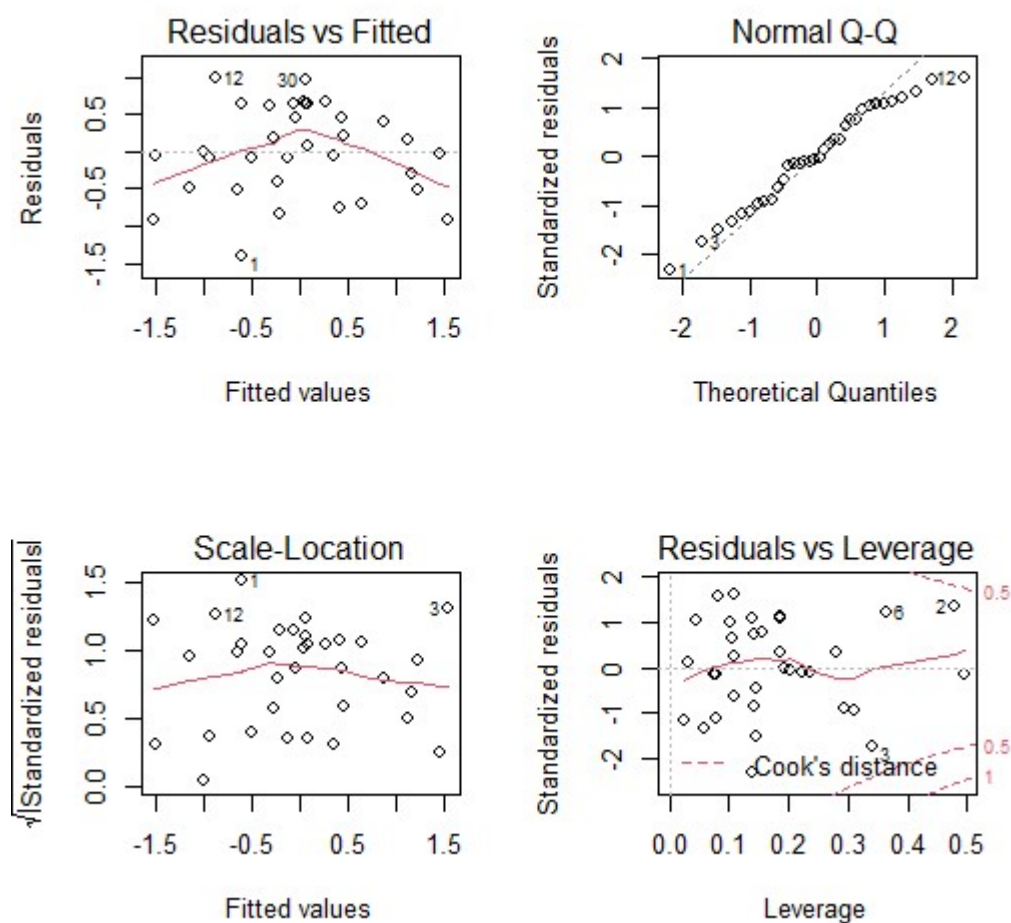

**Figure S2. Model diagnostics for the best model with MP1 as the explained variable, and 15 climate variables and the Year as the explanatory variables (Table 3). The plots of residuals follow Crawley (2013).**

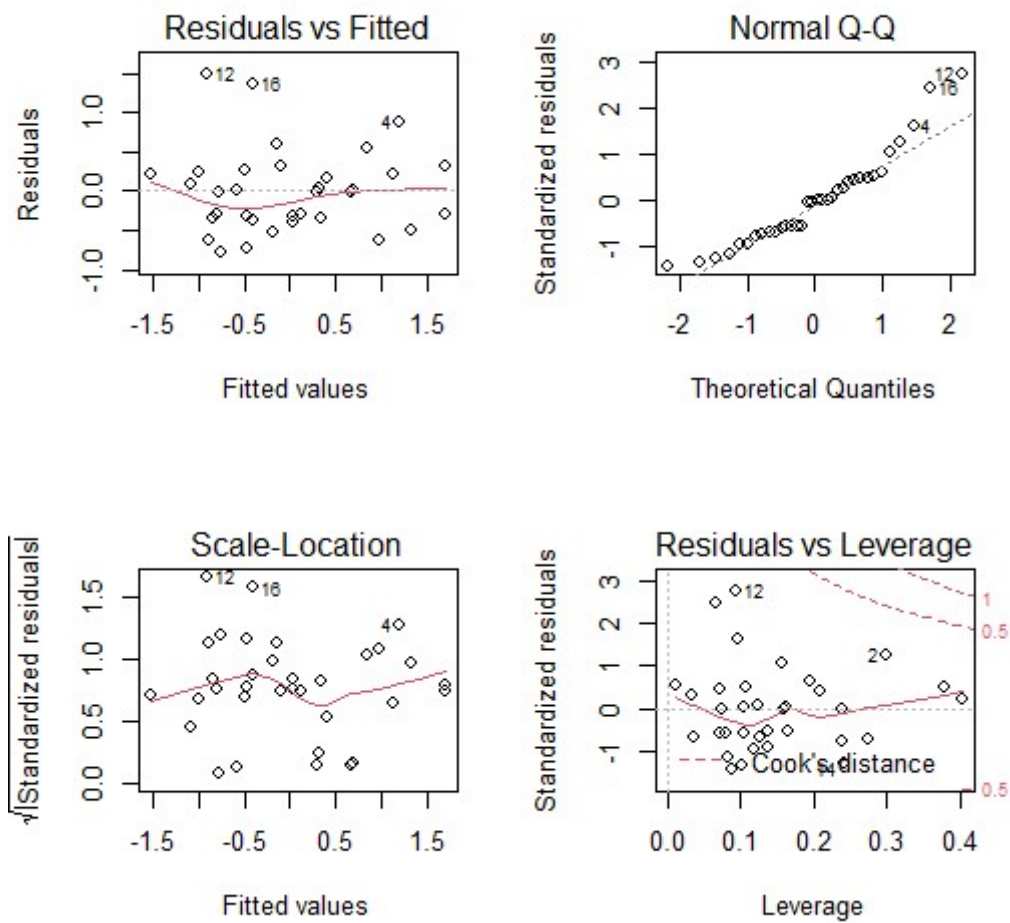

**Figure S3. Model diagnostics for the best model with MP2 as the explained variable, and 15 climate variables and the Year as explanatory variables (Table 3). The plots of residuals follow Crawley (2013).**

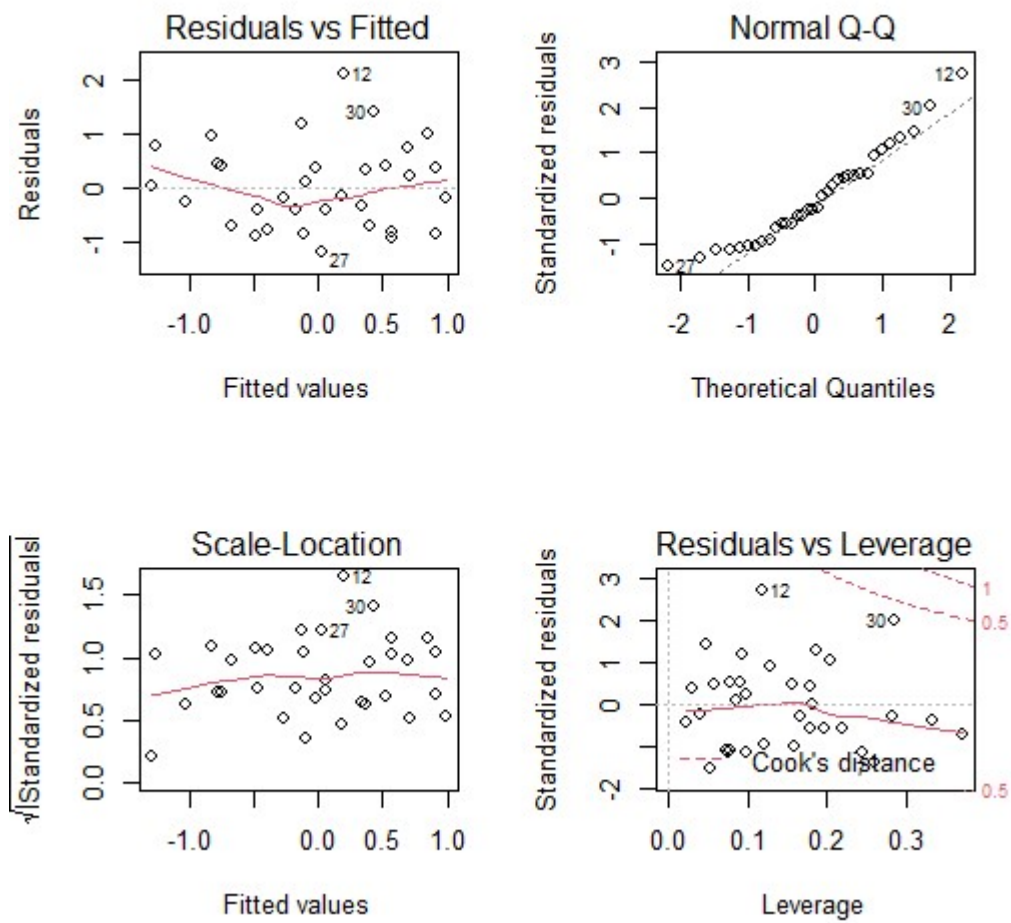

**Figure S4. Model diagnostics for the best model with MP3 as the explained variable, and 15 climate variables and the Year as explanatory variables (Table 3). The plots of residuals follow Crawley (2013).**

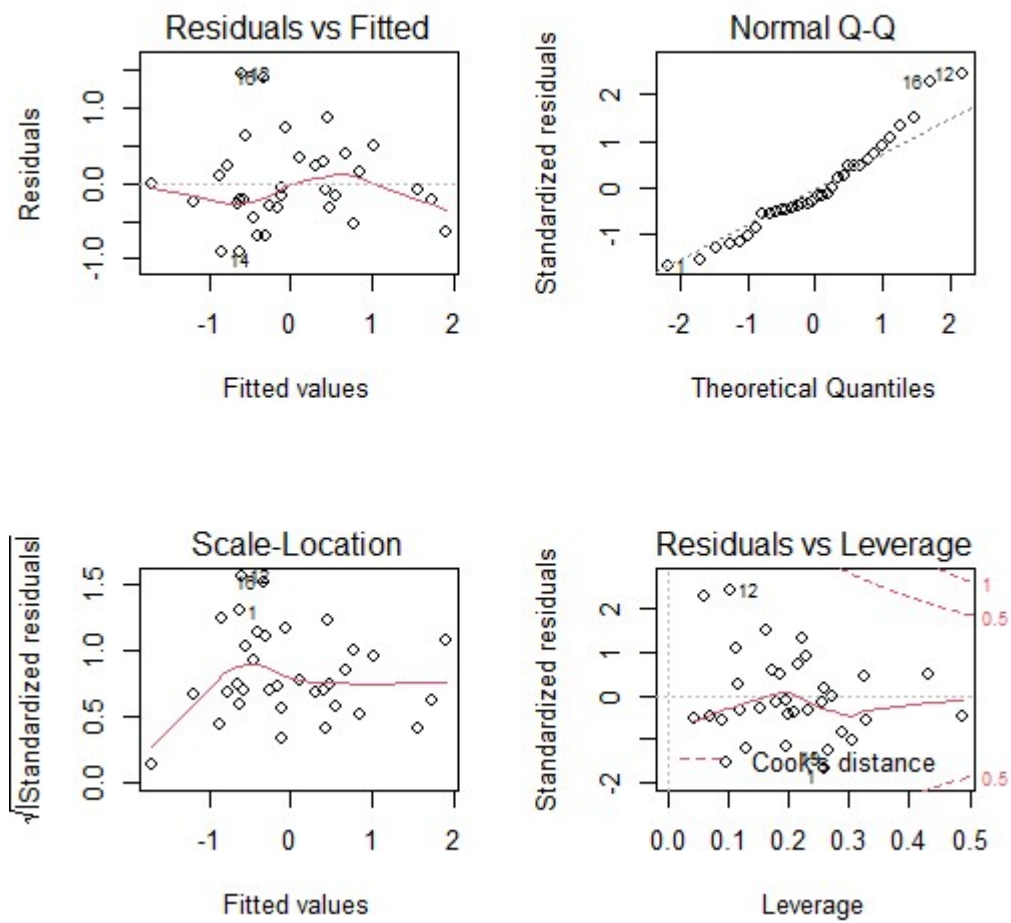

**Figure S5. Model diagnostics for the best model with overall spring AA as the explained variable, and 15 climate variables and the Year as explanatory variables (Table 3). The plots of residuals follow Crawley (2013).**

**Table S1. The numbers of Willow Warblers ringed each spring and autumn in 1981–2017 at both locations of the Bukowo ringing station, the numbers of mist nets used and numbers of birds caught each season of the study.** The two locations are 16 km apart: Kopań (54°27'11"N, 16°24'08"E) and Bukowo (54°20'13"N, 16°14'36"E). N = numbers of Willow Warblers caught each spring (1 April–15 May), aged as “full grown”; N nets = number of 8 m passerine mist nets used each season, N juv = total number of juvenile Willow Warblers caught each autumn, N juvAB\_50 = number of juveniles caught each autumn recalculated as catch per 50 mist nets. “–” = seasons excluded from this study because fewer than 30 birds were caught.

| Year | Location | Spring |        |       | Autumn |            |
|------|----------|--------|--------|-------|--------|------------|
|      |          | N      | N nets | N juv | N nets | N juvAB_50 |
| 1981 | Kopań    | –      | 57     | 689   | 45     | 765        |
| 1982 | Kopań    | 1016   | 57     | 1048  | 50     | 1048       |
| 1983 | Kopań    | 498    | 57     | 440   | 53     | 415        |
| 1984 | Kopań    | 180    | 42     | 119   | 38     | 156        |
| 1985 | Kopań    | 189    | 51     | 152   | 44     | 173        |
| 1986 | Kopań    | 62     | 50     | 67    | 43     | 78         |
| 1987 | Kopań    | 76     | 45     | 40    | 55     | 36         |
| 1988 | Kopań    | 64     | 45     | 39    | 55     | 35         |
| 1989 | Kopań    | 84     | 45     | 46    | 45     | 51         |
| 1990 | Kopań    | 34     | 45     | 205   | 45     | 228        |
| 1991 | Kopań    | 52     | 45     | 40    | 46     | 43         |
| 1992 | Kopań    | 31     | 37     | 100   | 49     | 102        |
| 1993 | Kopań    | –      | 47     | 286   | 55     | 260        |
| 1994 | Kopań    | 71     | 47     | 132   | 47     | 140        |
| 1995 | Kopań    | 79     | 47     | 257   | 55     | 234        |
| 1996 | Kopań    | 108    | 47     | 444   | 70     | 317        |
| 1997 | Kopań    | 161    | 47     | 151   | 60     | 126        |
| 1998 | Kopań    | 80     | 47     | 643   | 64     | 502        |
| 1999 | Kopań    | 133    | 47     | 176   | 60     | 147        |
| 2000 | Kopań    | 72     | 47     | 228   | 60     | 190        |
| 2001 | Kopań    | 95     | 57     | 169   | 60     | 141        |
| 2002 | Kopań    | 92     | 47     | 303   | 65     | 233        |
| 2003 | Kopań    | 58     | 46     | 175   | 69     | 127        |
| 2004 | Kopań    | 99     | 47     | 223   | 70     | 159        |
| 2005 | Kopań    | 177    | 47     | 119   | 76     | 78         |
| 2006 | Kopań    | 107    | 47     | 182   | 60     | 152        |
| 2007 | Kopań    | 147    | 54     | 169   | 62     | 136        |
| 2008 | Kopań    | 115    | 50     | 89    | 62     | 72         |
| 2009 | Kopań    | 107    | 46     | 125   | 64     | 98         |
| 2010 | Kopań    | 85     | 35     | 62    | 63     | 49         |
| 2011 | –        | –      | –      | –     | –      | –          |
| 2012 | Bukowo   | 138    | 56     | 50    | 56     | 45         |
| 2013 | Bukowo   | 85     | 51     | 87    | 42     | 104        |
| 2014 | Bukowo   | 71     | 48     | 130   | 48     | 135        |
| 2015 | Bukowo   | 42     | 51     | 110   | 51     | 108        |
| 2016 | Bukowo   | 72     | 52     | 64    | 48     | 63         |
| 2017 | Bukowo   | 78     | 52     | 60    | 54     | 62         |



**Table S2. Counts of Willow Warblers ringed each spring and autumn in 1981–2017 at Bukowo, Baltic Sea coast, Poland.** N = numbers of Willow Warblers aged as “full grown” during spring migration (1 April–15 May) used to calculate the Annual Anomaly for the whole spring season (AA) and for the three main periods of spring passage (MP1, MP2, MP3). N juvAB\_50 = numbers of juvenile Willow Warblers caught at Bukowo during autumn migration (14 August–29 October) in 1981–2018, recalculated as catches per 50 mist nets (as in Table S1), % juv aut = proportion of juveniles among Willow Warblers caught at Bukowo during autumn migration; “–” = seasons excluded from analyses because fewer than 30 Willow Warblers were caught. Symbols and dates as in Table 2 and Fig. S1.

| Year | N MP1 | N MP2 | N MP3 | N AA | AA<br>MP1 | AA<br>MP2 | AA<br>MP3 | AA    | NjuvAB<br>50 | % juv<br>aut |
|------|-------|-------|-------|------|-----------|-----------|-----------|-------|--------------|--------------|
| 1981 | –     | –     | –     | –    | –         | –         | –         | –     | 765          | 94%          |
| 1982 | 36    | 592   | 388   | 1016 | 2.14      | 3.15      | 0.02      | 5.14  | 1048         | 82%          |
| 1983 | 102   | 256   | 140   | 498  | 1.08      | 0.55      | –0.18     | 1.27  | 415          | 84%          |
| 1984 | 29    | 47    | 104   | 180  | 1.58      | 2.25      | 0.89      | 4.54  | 156          | 94%          |
| 1985 | 27    | 40    | 122   | 189  | 1.24      | 2.39      | 0.96      | 4.41  | 173          | 88%          |
| 1986 | 4     | 27    | 31    | 62   | 2.12      | 1.06      | 0.47      | 3.47  | 78           | 100%         |
| 1987 | 15    | 42    | 19    | 76   | 1.15      | 0.42      | –0.20     | 1.19  | 36           | 100%         |
| 1988 | 25    | 21    | 18    | 64   | –0.94     | –0.42     | –0.12     | –1.65 | 35           | 94%          |
| 1989 | 44    | 22    | 18    | 84   | –3.14     | –1.79     | –0.18     | –5.28 | 51           | 98%          |
| 1990 | 6     | 12    | 16    | 34   | 1.52      | 1.63      | 0.73      | 3.70  | 228          | 100%         |
| 1991 | 14    | 16    | 22    | 52   | 0.01      | 0.67      | –0.03     | 0.48  | 43           | 94%          |
| 1992 | 7     | 20    | 4     | 31   | 1.19      | –2.03     | –0.85     | –1.87 | 102          | 92%          |
| 1993 | –     | –     | –     | –    | –         | –         | –         | –     | 260          | 87%          |
| 1994 | 18    | 32    | 21    | 71   | –0.44     | –0.47     | 0.12      | –0.97 | 140          | 89%          |
| 1995 | 19    | 26    | 34    | 79   | 1.00      | 0.83      | 0.21      | 1.86  | 234          | 83%          |
| 1996 | 16    | 28    | 64    | 108  | 1.75      | 2.37      | 1.30      | 5.25  | 317          | 87%          |
| 1997 | 0     | 36    | 125   | 161  | 2.37      | 3.21      | –0.10     | 5.30  | 126          | 97%          |
| 1998 | 43    | 19    | 18    | 80   | –0.84     | –1.46     | –0.22     | –2.69 | 502          | 90%          |
| 1999 | 27    | 41    | 65    | 133  | 1.23      | 1.26      | 1.40      | 3.72  | 147          | 87%          |
| 2000 | 44    | 20    | 8     | 72   | –2.57     | –2.34     | –0.94     | –6.02 | 190          | 98%          |
| 2001 | 13    | 44    | 38    | 95   | 0.54      | 0.43      | 0.76      | 1.56  | 141          | 91%          |
| 2002 | 17    | 58    | 17    | 92   | 1.18      | –0.40     | –0.25     | 0.35  | 233          | 87%          |
| 2003 | 18    | 31    | 10    | 58   | 0.34      | –1.27     | –0.76     | –1.87 | 127          | 76%          |
| 2004 | 43    | 35    | 21    | 99   | –1.58     | –1.04     | –0.69     | –3.49 | 159          | 96%          |
| 2005 | 17    | 109   | 51    | 177  | 1.50      | 1.24      | –0.22     | 2.34  | 78           | 90%          |
| 2006 | 49    | 38    | 20    | 107  | –0.27     | –1.81     | –0.84     | –3.09 | 152          | 95%          |
| 2007 | 38    | 31    | 78    | 147  | 0.26      | 1.11      | 1.76      | 2.96  | 136          | 81%          |
| 2008 | 34    | 48    | 33    | 115  | –0.08     | 0.00      | –0.31     | –0.56 | 72           | 94%          |
| 2009 | 57    | 19    | 31    | 107  | –3.85     | –1.01     | 0.06      | –4.98 | 98           | 95%          |
| 2010 | 27    | 24    | 34    | 85   | 0.55      | –0.06     | 0.59      | 0.90  | 49           | 96%          |
| 2011 | –     | –     | –     | –    | –         | –         | –         | –     | –            | –            |
| 2012 | 78    | 42    | 18    | 138  | –2.43     | –2.36     | –0.97     | –5.94 | 45           | 93%          |
| 2013 | 36    | 26    | 23    | 85   | –1.53     | –1.11     | –0.43     | –3.25 | 104          | 93%          |
| 2014 | 33    | 15    | 23    | 71   | –1.63     | –0.78     | –0.26     | –2.84 | 135          | 97%          |
| 2015 | 15    | 18    | 9     | 42   | 0.14      | –1.75     | –0.84     | –2.63 | 108          | 94%          |
| 2016 | 27    | 27    | 18    | 72   | –1.79     | –1.12     | –0.64     | –3.73 | 63           | 82%          |
| 2017 | 13    | 26    | 39    | 78   | 0.75      | 1.24      | 0.60      | 2.41  | 62           | 84%          |

**Table S3. Comparison of numbers of Willow Warblers caught at Kopań and Bukowo.** NAA = numbers of Willow Warblers caught in spring used to calculate the Annual Anomaly for 1982–2017; N/net spring = number of birds caught per net each spring; N juvAB\_50 = numbers of juvenile Willow Warblers caught at Bukowo during autumn migration in 1981–2018, recalculated per 50 mist nets; Njuv/net autumn = number of juveniles caught per net each autumn. Data for this comparison is in Tables S1 and S2.

| Variable        | N years |        | U-test |       |
|-----------------|---------|--------|--------|-------|
|                 | Kopań   | Bukowo | U      | p     |
| <b>Spring</b>   |         |        |        |       |
| NAA             | 28      | 6      | 58.5   | 0.259 |
| N/net spring    | 28      | 6      | 46.5   | 0.095 |
| <b>Autumn</b>   |         |        |        |       |
| N juvAB_50      | 30      | 6      | 45.0   | 0.059 |
| Njuv/net autumn | 30      | 6      | 45.0   | 0.059 |

**Table S4. Relationships between the numbers of caught birds (NAA) and the Year (YearN), and the Annual Anomaly in the timing of migration for three main periods of spring (MP1, MP2, MP3) and the whole spring (AA) for Willow Warblers caught at Bukowo, Poland, in 1982–2017.** Estimate – coefficients from multiple regression, SE – standard error of the estimates; *t*, *p* – *t*-test and significance of each estimate, *p* < 0.05 marked in **bold** face.

| Explanatory variable                                               | Estimate     | SE          | <i>t</i>     | <i>p</i>     |
|--------------------------------------------------------------------|--------------|-------------|--------------|--------------|
| <b>MP1</b> Model statistics: $F_{2,31} = 4.21$ , $AdjR^2 = 16.3\%$ |              |             |              |              |
| YearN                                                              | <b>-0.06</b> | <b>0.03</b> | <b>-2.26</b> | <b>0.031</b> |
| N AA                                                               | 0.00         | 0.00        | 0.82         | 0.416        |
| Intercept                                                          | 0.98         | 0.64        | 1.53         | 0.136        |
| <b>MP2</b> Model statistics: $F_{2,31} = 6.21$ , $AdjR^2 = 24.0\%$ |              |             |              |              |
| YearN                                                              | -0.05        | 0.02        | -2.03        | 0.051        |
| N AA                                                               | 0.00         | 0.00        | 1.90         | 0.066        |
| Intercept                                                          | 0.61         | 0.60        | 1.01         | 0.322        |
| <b>MP3</b> Model statistics: $F_{2,31} = 1.05$ , $AdjR^2 = 0.3\%$  |              |             |              |              |
| YearN                                                              | -0.02        | 0.01        | -1.40        | 0.171        |
| N AA                                                               | 0.00         | 0.00        | -0.19        | 0.852        |
| Intercept                                                          | 0.37         | 0.31        | 1.18         | 0.245        |
| <b>AA</b> Model statistics: $F_{2,31} = 5.11$ , $AdjR^2 = 19.9\%$  |              |             |              |              |
| YearN                                                              | <b>-0.13</b> | 0.05        | -2.29        | <b>0.029</b> |
| N AA                                                               | 0.00         | 0.00        | 1.19         | 0.242        |
| Intercept                                                          | 1.78         | 1.36        | 1.31         | 0.199        |

**Table S5. Pearson’s correlation coefficients of climate indices in 1981–2017 used in multiple regression models.** Abbreviations of the climate variables as in Table 1; “\_1y” = climate indices from the year preceding the spring being analysed. Significant correlations after Benjamini-Hochberg correction for multiple comparisons with accepted 5% level of false positives marked in **bold** face.

| Variable         | TLEB<br>APR_MAY | NAO<br>APR_MAY | SCAND<br>APR_MAY | NAO<br>NOV<br>MAR | PSAH<br>NOV<br>MAR | TSAH<br>NOV<br>MAR | IOD<br>NOV<br>MAR | SOI<br>NOV<br>MAR | NAO<br>AUG<br>OCT_1y | SAH<br>AUG<br>OCT_1y | TSAH<br>AUG<br>OCT_1y | IOD<br>AUG<br>OCT_1y | SOI<br>AUG<br>OCT_1y | NAO<br>JUN<br>JUL_1y |
|------------------|-----------------|----------------|------------------|-------------------|--------------------|--------------------|-------------------|-------------------|----------------------|----------------------|-----------------------|----------------------|----------------------|----------------------|
| TLEB_APR_MAY     |                 |                |                  |                   |                    |                    |                   |                   |                      |                      |                       |                      |                      |                      |
| NAO_APR_MAY      | <b>-0.09</b>    |                |                  |                   |                    |                    |                   |                   |                      |                      |                       |                      |                      |                      |
| SCAND_APR_MAY    | <b>-0.08</b>    | <b>-0.02</b>   |                  |                   |                    |                    |                   |                   |                      |                      |                       |                      |                      |                      |
| NAO_NOV_MAR      | 0.02            | 0.17           | <b>-0.10</b>     |                   |                    |                    |                   |                   |                      |                      |                       |                      |                      |                      |
| PSAH_NOV_MAR     | 0.07            | <b>-0.01</b>   | <b>-0.01</b>     | 0.07              |                    |                    |                   |                   |                      |                      |                       |                      |                      |                      |
| TSAH_NOV_MAR     | 0.28            | <b>-0.22</b>   | 0.03             | <b>-0.53</b>      | 0.24               |                    |                   |                   |                      |                      |                       |                      |                      |                      |
| IOD_NOV_MAR      | 0.06            | <b>-0.27</b>   | <b>-0.01</b>     | <b>-0.01</b>      | <b>-0.10</b>       | 0.30               |                   |                   |                      |                      |                       |                      |                      |                      |
| SOI_NOV_MAR      | <b>-0.02</b>    | <b>-0.02</b>   | <b>-0.20</b>     | <b>-0.06</b>      | 0.05               | <b>-0.09</b>       | <b>-0.11</b>      |                   |                      |                      |                       |                      |                      |                      |
| NAO_AUG_OCT_1y   | <b>-0.31</b>    | <b>-0.04</b>   | 0.27             | <b>-0.12</b>      | 0.00               | <b>-0.01</b>       | <b>-0.37</b>      | <b>-0.09</b>      |                      |                      |                       |                      |                      |                      |
| SAH_AUG_OCT_1y   | 0.28            | 0.02           | <b>-0.15</b>     | 0.27              | 0.11               | 0.08               | 0.39              | 0.11              | <b>-0.29</b>         |                      |                       |                      |                      |                      |
| TSAH_AUG_OCT_1y  | 0.29            | <b>-0.25</b>   | <b>-0.02</b>     | <b>-0.24</b>      | 0.02               | 0.69               | 0.22              | <b>-0.14</b>      | <b>-0.14</b>         | <b>-0.28</b>         |                       |                      |                      |                      |
| IOD_AUG_OCT_1y   | 0.07            | <b>-0.18</b>   | 0.27             | 0.19              | <b>-0.08</b>       | 0.09               | <b>0.60</b>       | <b>-0.40</b>      | <b>-0.21</b>         | 0.24                 | 0.09                  |                      |                      |                      |
| SOI_AUG_OCT_1y   | <b>-0.16</b>    | 0.15           | <b>-0.17</b>     | <b>-0.23</b>      | <b>-0.09</b>       | <b>-0.05</b>       | <b>-0.33</b>      | <b>0.82</b>       | 0.11                 | <b>-0.02</b>         | <b>-0.16</b>          | <b>-0.60</b>         |                      |                      |
| NAO_JUN_JUL_1y   | 0.16            | 0.14           | 0.37             | <b>-0.11</b>      | 0.11               | <b>-0.10</b>       | <b>-0.46</b>      | <b>-0.10</b>      | 0.02                 | <b>-0.13</b>         | <b>-0.22</b>          | <b>-0.32</b>         | <b>-0.03</b>         |                      |
| SCAND_JUN_JUL_1y | <b>-0.39</b>    | <b>-0.09</b>   | 0.16             | 0.00              | <b>-0.22</b>       | <b>-0.02</b>       | 0.35              | 0.06              | 0.26                 | <b>-0.16</b>         | <b>-0.06</b>          | 0.23                 | 0.08                 | <b>-0.38</b>         |

**Table S6. Summary statistics for linear regressions over the year in 1982–2017 for the climate variables used in the study.** June–July and August–October means are averages in 1981–2016 for the season preceding Willow Warblers’ spring migrations in 1982–2017. Values averaged for the given range of months and used as raw (non-standardised) data. Abbreviations of variables as in Table 1.  $P < 0.05$  marked in **bold** face.

| Parameter              | $\beta$ slope  | SE     | $R^2$ | $t_{32}$ | $P$            |
|------------------------|----------------|--------|-------|----------|----------------|
| <b>TLEB Apr–May</b>    | <b>0.0406</b>  | 0.0132 | 0.23  | 3.07     | <b>0.0044</b>  |
| NAO Apr–May            | -0.0099        | 0.0123 | 0.02  | -0.80    | 0.4272         |
| SCAN Apr–May           | 0.0028         | 0.0104 | 0.002 | 0.27     | 0.7902         |
| NAO Nov–Mar            | 0.1403         | 0.0962 | 0.06  | 1.46     | 0.1543         |
| PSAH Nov–Mar           | 0.0177         | 0.0165 | 0.03  | 1.07     | 0.2907         |
| <b>TSAH Nov–Mar</b>    | <b>0.0349</b>  | 0.0073 | 0.40  | 4.75     | <b>0.00004</b> |
| <b>IOD Nov–Mar</b>     | <b>0.0066</b>  | 0.0030 | 0.13  | 2.22     | <b>0.0338</b>  |
| SOI Nov–Mar            | 0.0176         | 0.0088 | 0.11  | 1.99     | 0.0548         |
| NAO Aug–Oct_1y         | -0.0143        | 0.0090 | 0.07  | -1.60    | 0.1204         |
| <b>PSAH Aug–Oct_1y</b> | <b>8.4100</b>  | 2.4360 | 0.27  | 3.45     | <b>0.0016</b>  |
| <b>TSAH Aug–Oct_1y</b> | <b>0.0167</b>  | 0.0053 | 0.23  | 3.17     | <b>0.0032</b>  |
| IOD Aug–Oct_1y         | 0.0034         | 0.0134 | 0.002 | 0.26     | 0.8004         |
| SOI Aug–Oct_1y         | 0.0083         | 0.0062 | 0.05  | 1.35     | 0.1871         |
| <b>NAO Jun–Jul_1y</b>  | <b>-0.0310</b> | 0.0127 | 0.16  | -2.44    | <b>0.0204</b>  |
| SCAND Jun–Jul_1y       | -0.0139        | 0.0165 | 0.02  | -0.84    | 0.4065         |

**Table S7. Summary statistics for linear regressions on the metrics of spring migration phenology of Willow Warblers at Bukowo, Poland, in 1982–2017.** Plots for the three main periods of spring (MP1, MP2, MP3) and for the overall spring Annual Anomaly (AA) are presented in Fig. 3.  $\beta$  slope = regression coefficient; SE = Standard Error;  $R^2$  – determination coefficient;  $t$ ,  $p$  = results of  $t$ -test, significant  $p$  values after applying Benjamini-Hochberg correction (Benjamini & Hochberg, 1995) for multiple comparisons marked in **bold** face,  $36 \times \beta$  = estimated change in days of migration timing over 1982–2017, negative values reflect earlier migration.

| Parameter | $\beta$ slope | SE   | $R^2$ | $t_{34}$ | $p$          | 36 years *<br>$\beta$ (days) |
|-----------|---------------|------|-------|----------|--------------|------------------------------|
| MP1       | -0.07         | 0.02 | 0.20  | -2.80    | <b>0.009</b> | -2.42                        |
| MP2       | -0.06         | 0.02 | 0.21  | -2.94    | <b>0.006</b> | -2.29                        |
| MP3       | -0.02         | 0.01 | 0.06  | -1.48    | 0.149        | -0.72                        |
| AA        | -0.15         | 0.05 | 0.21  | -2.95    | <b>0.006</b> | -5.43                        |

**Table S8. Relationships between 13 climate variables and year in full models, and Annual Anomaly in the timing of migration for three main periods of spring (MP1, MP2, MP3) and whole spring (AA) for Willow Warblers caught at Bukowo, Poland, in 1982–2017.** Estimate – coefficients from multiple regression, SE – standard error of the estimates;  $t$ ,  $p$  –  $t$ -test and significance of each estimate,  $p < 0.05$  marked in **bold** face,  $0.05 < p < 0.1$  in **bold italics**. VIF – variance inflation factor.  $R^2$  – partial determination coefficients,  $pR$  – Pearson’s partial correlation coefficient. Symbols for climate variables as in Table 1, for periods as in Table 2.

| Explanatory variable    | Estimate                                            | SE   | $t$   | $p$          | VIF  | $R^2$ | $pR$  |
|-------------------------|-----------------------------------------------------|------|-------|--------------|------|-------|-------|
| <b>MP1</b>              | Full model: $F_{16,18} = 2.591$ , $AdjR^2 = 42.8\%$ |      |       |              |      |       |       |
| YearN                   | 0.00                                                | 0.01 | 0.26  | 0.797        | 1.29 | 0.00  | 0.22  |
| LEB_APR_MAY             | -0.08                                               | 0.17 | -0.49 | 0.632        | 1.72 | 0.01  | -0.20 |
| NAO_APR_MAY             | -0.35                                               | 0.15 | -2.32 | <b>0.032</b> | 1.35 | 0.23  | -0.49 |
| SCAND_APR_MAY           | -0.05                                               | 0.19 | -0.28 | 0.780        | 2.08 | 0.00  | -0.05 |
| NAO_NOV_MAR             | -0.20                                               | 0.23 | -0.88 | 0.391        | 3.03 | 0.04  | -0.25 |
| PSAH_NOV_MAR            | -0.11                                               | 0.17 | -0.67 | 0.509        | 1.64 | 0.02  | -0.21 |
| TSAH_NOV_MAR            | 0.10                                                | 0.34 | 0.28  | 0.782        | 6.71 | 0.00  | -0.03 |
| IOD_NOV_MAR             | -0.17                                               | 0.25 | -0.67 | 0.514        | 3.83 | 0.02  | -0.08 |
| SOI_NOV_MAR             | -0.26                                               | 0.29 | -0.88 | 0.390        | 5.02 | 0.04  | -0.23 |
| NAO_AUG_OCT_1y          | -0.13                                               | 0.19 | -0.70 | 0.493        | 2.19 | 0.03  | -0.13 |
| PSAH_AUG_OCT_1y         | -0.34                                               | 0.26 | -1.32 | 0.202        | 3.89 | 0.09  | -0.36 |
| TSAH_AUG_OCT_1y         | -0.39                                               | 0.31 | -1.25 | 0.229        | 5.84 | 0.08  | -0.33 |
| <b>IOD_AUG_OCT_1y</b>   | -0.49                                               | 0.24 | -2.08 | <b>0.052</b> | 3.34 | 0.19  | -0.47 |
| SOI_AUG_OCT_1y          | -0.36                                               | 0.35 | -1.04 | 0.311        | 7.24 | 0.06  | -0.26 |
| NAO_JUN_JUL_1y          | -0.04                                               | 0.22 | -0.17 | 0.866        | 2.80 | 0.00  | 0.04  |
| SCAND JUN JUL 1y        | -0.20                                               | 0.20 | -0.99 | 0.334        | 2.37 | 0.05  | -0.28 |
| <b>MP2</b>              | Full model: $F_{16,18} = 4.547$ , $AdjR^2 = 62.5\%$ |      |       |              |      |       |       |
| YearN                   | 0.00                                                | 0.01 | 0.16  | 0.871        | 1.29 | 0.00  | 0.13  |
| <b>LEB_APR_MAY</b>      | -0.42                                               | 0.14 | -3.09 | <b>0.006</b> | 1.72 | 0.35  | -0.58 |
| <b>NAO_APR_MAY</b>      | -0.51                                               | 0.12 | -4.19 | <b>0.001</b> | 1.35 | 0.49  | -0.71 |
| SCAND_APR_MAY           | 0.04                                                | 0.15 | 0.30  | 0.771        | 2.08 | 0.00  | 0.08  |
| NAO_NOV_MAR             | -0.14                                               | 0.18 | -0.78 | 0.447        | 3.03 | 0.03  | -0.21 |
| PSAH_NOV_MAR            | -0.14                                               | 0.13 | -1.01 | 0.326        | 1.64 | 0.05  | -0.26 |
| TSAH_NOV_MAR            | 0.00                                                | 0.28 | -0.01 | 0.993        | 6.71 | 0.00  | -0.05 |
| IOD_NOV_MAR             | 0.07                                                | 0.21 | 0.32  | 0.753        | 3.83 | 0.01  | 0.11  |
| SOI_NOV_MAR             | -0.10                                               | 0.24 | -0.41 | 0.689        | 5.02 | 0.01  | -0.11 |
| NAO_AUG_OCT_1y          | -0.16                                               | 0.16 | -1.02 | 0.319        | 2.19 | 0.06  | -0.21 |
| PSAH_AUG_OCT_1y         | -0.31                                               | 0.21 | -1.49 | 0.153        | 3.89 | 0.11  | -0.34 |
| TSAH_AUG_OCT_1y         | -0.26                                               | 0.25 | -1.02 | 0.323        | 5.84 | 0.05  | -0.26 |
| <b>IOD_AUG_OCT_1y</b>   | -0.48                                               | 0.19 | -2.48 | <b>0.023</b> | 3.34 | 0.26  | -0.52 |
| SOI_AUG_OCT_1y          | -0.10                                               | 0.28 | -0.34 | 0.736        | 7.24 | 0.01  | -0.10 |
| NAO_JUN_JUL_1y          | -0.07                                               | 0.18 | -0.41 | 0.686        | 2.80 | 0.01  | -0.05 |
| <b>SCAND JUN JUL 1y</b> | -0.52                                               | 0.16 | -3.22 | <b>0.005</b> | 2.37 | 0.36  | -0.61 |

**Table S8. continued**

| Explanatory variable           | Estimate                                            | SE   | <i>t</i> | <i>p</i>     | VIF  | <i>R</i> <sup>2</sup> | <i>pR</i> |
|--------------------------------|-----------------------------------------------------|------|----------|--------------|------|-----------------------|-----------|
| <b>MP3</b>                     | Full model: $F_{16,18} = 1.164$ , $AdjR^2 = 7.2\%$  |      |          |              |      |                       |           |
| YearN                          | 0.00                                                | 0.01 | 0.07     | 0.946        | 1.29 | 0.00                  | 0.15      |
| LEB_APR_MAY                    | -0.37                                               | 0.22 | -1.69    | 0.108        | 1.72 | 0.14                  | -0.39     |
| NAO_APR_MAY                    | -0.26                                               | 0.19 | -1.34    | 0.198        | 1.35 | 0.09                  | -0.30     |
| SCAND_APR_MAY                  | 0.18                                                | 0.24 | 0.74     | 0.471        | 2.08 | 0.03                  | 0.19      |
| NAO_NOV_MAR                    | -0.37                                               | 0.29 | -1.28    | 0.218        | 3.03 | 0.08                  | -0.31     |
| PSAH_NOV_MAR                   | -0.34                                               | 0.21 | -1.61    | 0.124        | 1.64 | 0.13                  | -0.38     |
| TSAH_NOV_MAR                   | -0.23                                               | 0.44 | -0.53    | 0.601        | 6.71 | 0.02                  | -0.17     |
| IOD_NOV_MAR                    | 0.08                                                | 0.32 | 0.26     | 0.801        | 3.83 | 0.00                  | 0.11      |
| SOI_NOV_MAR                    | 0.19                                                | 0.37 | 0.53     | 0.605        | 5.02 | 0.02                  | 0.10      |
| NAO_AUG_OCT_1y                 | -0.11                                               | 0.25 | -0.45    | 0.655        | 2.19 | 0.01                  | -0.08     |
| PSAH_AUG_OCT_1y                | 0.11                                                | 0.33 | 0.34     | 0.737        | 3.89 | 0.01                  | -0.01     |
| TSAH_AUG_OCT_1y                | 0.17                                                | 0.40 | 0.42     | 0.682        | 5.84 | 0.01                  | 0.05      |
| IOD_AUG_OCT_1y                 | -0.26                                               | 0.30 | -0.86    | 0.401        | 3.34 | 0.04                  | -0.23     |
| SOI_AUG_OCT_1y                 | -0.16                                               | 0.44 | -0.37    | 0.715        | 7.24 | 0.01                  | -0.10     |
| NAO_JUN_JUL_1y                 | 0.11                                                | 0.28 | 0.41     | 0.685        | 2.80 | 0.01                  | 0.14      |
| SCAND_JUN_JUL_1y               | -0.32                                               | 0.25 | -1.26    | 0.226        | 2.37 | 0.08                  | -0.31     |
| <b>AA</b>                      | Full model: $F_{16,18} = 3.066$ , $AdjR^2 = 49.3\%$ |      |          |              |      |                       |           |
| YearN                          | 0.00                                                | 0.01 | 0.21     | 0.840        | 1.29 | 0.00                  | 0.20      |
| <b><i>TLEB_APR_MAY</i></b>     | -0.31                                               | 0.16 | -1.91    | <b>0.072</b> | 1.72 | 0.17                  | -0.45     |
| <b><i>NAO_APR_MAY</i></b>      | -0.44                                               | 0.14 | -3.10    | <b>0.006</b> | 1.35 | 0.35                  | -0.60     |
| SCAND_APR_MAY                  | 0.04                                                | 0.18 | 0.21     | 0.838        | 2.08 | 0.00                  | 0.07      |
| NAO_NOV_MAR                    | -0.24                                               | 0.21 | -1.13    | 0.273        | 3.03 | 0.07                  | -0.30     |
| PSAH_NOV_MAR                   | -0.19                                               | 0.16 | -1.23    | 0.236        | 1.64 | 0.08                  | -0.32     |
| TSAH_NOV_MAR                   | -0.01                                               | 0.32 | -0.03    | 0.974        | 6.71 | 0.00                  | -0.09     |
| IOD_NOV_MAR                    | -0.03                                               | 0.24 | -0.13    | 0.899        | 3.83 | 0.00                  | 0.04      |
| SOI_NOV_MAR                    | -0.11                                               | 0.27 | -0.41    | 0.689        | 5.02 | 0.01                  | -0.12     |
| NAO_AUG_OCT_1y                 | -0.16                                               | 0.18 | -0.87    | 0.397        | 2.19 | 0.04                  | -0.17     |
| PSAH_AUG_OCT_1y                | -0.26                                               | 0.24 | -1.08    | 0.293        | 3.89 | 0.06                  | -0.31     |
| TSAH_AUG_OCT_1y                | -0.25                                               | 0.29 | -0.85    | 0.405        | 5.84 | 0.04                  | -0.25     |
| <b><i>IOD_AUG_OCT_1y</i></b>   | -0.49                                               | 0.22 | -2.21    | <b>0.041</b> | 3.34 | 0.21                  | -0.49     |
| SOI_AUG_OCT_1y                 | -0.25                                               | 0.33 | -0.76    | 0.456        | 7.24 | 0.03                  | -0.20     |
| NAO_JUN_JUL_1y                 | -0.02                                               | 0.20 | -0.10    | 0.922        | 2.80 | 0.00                  | 0.05      |
| <b><i>SCAND_JUN_JUL_1y</i></b> | -0.39                                               | 0.19 | -2.07    | <b>0.053</b> | 2.37 | 0.19                  | -0.47     |

**Table S9. Model selection procedure by “all subsets”, according to AICc, from the full model (Table S8) of the relationship between the 15 climate variables and the year, and timing of migration in the first main period of spring (MP1) for Willow Warblers caught at Bukowo, Poland, in 1982–2017.** The table presents all models with  $\Delta\text{AICc} < 2$ . The models ranked by corrected Akaike’s Information Criteria for small samples size (AICc),  $k$  is the number of estimated parameters in the model,  $\Delta\text{AICc}$  gives the difference in AICc from the model with lowest AICc,  $w_i$  is the Akaike weight. The best model, discussed in the text, in **bold** face. Model selection with the package MuMIn 1.43.6 (Bartoń, 2020) in R 4.0.3 (R Core Team, 2020). Abbreviations of variables as in Tables 1 and 2.

| Model formula                                                                                           | $k$      | AICc         | $\Delta\text{AICc}$ | $W_i$       |
|---------------------------------------------------------------------------------------------------------|----------|--------------|---------------------|-------------|
| <b>MP1~IOD_AUG_OCT_1y+NAO_APR_MAY+PSAH_AUG_OCT_1y+SCAND_JUN_JUL_1y+SOI_NOV_MAR+TSAH_AUG_OCT_1y</b>      | <b>7</b> | <b>79.17</b> | <b>0.00</b>         | <b>0.36</b> |
| MP1~IOD_AUG_OCT_1y+IOD_NOV_MAR+NAO_APR_MAY+NAO_NOV_MAR+SAH_AUG_OCT_1y+TSAH_NOV_MAR                      | 7        | 80.60        | 1.43                | 0.18        |
| MP1~IOD_AUG_OCT_1y+NAO_APR_MAY+NAO_NOV_MAR+PSAH_AUG_OCT_1y+SCAND_JUN_JUL_1y+SOI_NOV_MAR+TSAH_AUG_OCT_1y | 8        | 80.67        | 1.50                | 0.17        |
| MP1~IOD_AUG_OCT_1y+NAO_APR_MAY+NAO_NOV_MAR+SOI_NOV_MAR+TSAH_NOV_MAR                                     | 6        | 80.90        | 1.73                | 0.15        |
| MP1~IOD_AUG_OCT_1y+NAO_APR_MAY+PSAH_AUG_OCT_1y+SOI_NOV_MAR+TSAH_AUG_OCT_1y                              | 6        | 81.10        | 1.93                | 0.14        |

**Table S10. Model selection procedure by “all subsets”, according to AICc, from the full model (Table S8) of the relationship between 15 climate variables and the year, and timing of migration in the second main period of spring (MP2) for Willow Warblers caught at Bukowo, Poland, in 1982–2017.** The table presents all models with  $\Delta AICc < 2$ . The models were ranked by corrected Akaike’s Information Criteria for small samples size (AICc),  $k$  is the number of estimated parameters in the model,  $\Delta AICc$  gives the difference in AICc from the model with lowest AICc,  $w_i$  is the Akaike weight. The best model, discussed in the text, in **bold** face. Model selection with the package MuMIn 1.43.6 (Bartoń, 2020) in R 4.0.3 (R Core Team, 2020). Abbreviations of variables as in Tables 1 and 2.

| Model formula                                                                                             | $k$      | AICc         | $\Delta AICc$ | $W_i$       |
|-----------------------------------------------------------------------------------------------------------|----------|--------------|---------------|-------------|
| <b>MP2~IOD_AUG_OCT_1y+TLEB_APR_MAY+NAO_APR_MAY+PSAH_AUG_OCT_1y+SCAND_JUN_JUL_1y</b>                       | <b>6</b> | <b>68.09</b> | <b>0.00</b>   | <b>0.18</b> |
| MP2~IOD_AUG_OCT_1y+TLEB_APR_MAY+NAO_APR_MAY+PSAH_AUG_OCT_1y+PSAH_NOV_MAR+SCAND_JUN_JUL_1y                 | 7        | 68.37        | 0.28          | 0.15        |
| MP2~IOD_AUG_OCT_1y+TLEB_APR_MAY+NAO_APR_MAY+PSAH_AUG_OCT_1y+SCAND_JUN_JUL_1y+TSAH_AUG_OCT_1y              | 7        | 68.89        | 0.80          | 0.12        |
| MP2~IOD_AUG_OCT_1y+TLEB_APR_MAY+NAO_APR_MAY+NAO_NOV_MAR+SCAND_JUN_JUL_1y+TSAH_NOV_MAR                     | 7        | 69.15        | 1.06          | 0.10        |
| MP2~IOD_AUG_OCT_1y+TLEB_APR_MAY+NAO_APR_MAY+NAO_NOV_MAR+PSAH_AUG_OCT_1y+SCAND_JUN_JUL_1y+TSAH_NOV_MAR     | 8        | 69.18        | 1.09          | 0.10        |
| MP2~IOD_AUG_OCT_1y+TLEB_APR_MAY+NAO_APR_MAY+NAO_NOV_MAR+SCAND_JUN_JUL_1y+SOI_AUG_OCT_1y+TSAH_NOV_MAR      | 8        | 69.27        | 1.18          | 0.10        |
| MP2~IOD_AUG_OCT_1y+TLEB_APR_MAY+NAO_APR_MAY+NAO_NOV_MAR+SCAND_JUN_JUL_1y+SOI_NOV_MAR+TSAH_NOV_MAR         | 8        | 69.37        | 1.27          | 0.09        |
| MP2~IOD_AUG_OCT_1y+TLEB_APR_MAY+NAO_APR_MAY+PSAH_AUG_OCT_1y+PSAH_NOV_MAR+SCAND_JUN_JUL_1y+TSAH_AUG_OCT_1y | 8        | 69.52        | 1.43          | 0.09        |
| MP2~IOD_AUG_OCT_1y+IOD_NOV_MAR+TLEB_APR_MAY+NAO_APR_MAY+PSAH_AUG_OCT_1y+SCAND_JUN_JUL_1y+TSAH_AUG_OCT_1y  | 8        | 69.83        | 1.74          | 0.07        |



**Table S11. Model selection procedure by “all subsets” selection, according to AICc, from the full model (Table S8) of the relationship between 15 climate variables and the year, and timing of migration in the third main period of spring (MP3) for Willow Warblers caught at Bukowo, Poland, in 1982–2017.** The table presents all models with  $\Delta\text{AICc} < 2$ . The models were ranked by corrected Akaike’s Information Criteria for small samples size (AICc),  $k$  is the number of estimated parameters in the model,  $\Delta\text{AICc}$  gives the difference in AICc from the model with lowest AICc,  $w_i$  is the Akaike weight. The best model, discussed in the text, in **bold** face. Model selection conducted using package MuMIn 1.43.6 (Bartoń, 2020) in R 4.0.3 (R Core Team, 2020). Abbreviations of variables as in Tables 1 and 2.

| Model formula                                                                         | $k$      | AICc         | $\Delta\text{AICc}$ | $W_i$       |
|---------------------------------------------------------------------------------------|----------|--------------|---------------------|-------------|
| <b>MP3~TLEB_APR_MAY+NAO_APR_MAY+NAO_NOV_MAR+PSAH_NOV_MAR+SCAND_JUN_JUL_1y</b>         | <b>6</b> | <b>92.69</b> | <b>0.00</b>         | <b>0.21</b> |
| MP3~TLEB_APR_MAY+NAO_NOV_MAR+PSAH_NOV_MAR+SCAND_JUN_JUL_1y                            | 5        | 92.95        | 0.26                | 0.19        |
| MP3~NAO_NOV_MAR+PSAH_NOV_MAR+SCAND_JUN_JUL_1y                                         | 4        | 93.90        | 1.21                | 0.12        |
| MP3~NAO_NOV_MAR+PSAH_NOV_MAR                                                          | 3        | 93.99        | 1.30                | 0.11        |
| MP3~NAO_NOV_MAR+TSAH_AUG_OCT_1y                                                       | 3        | 94.07        | 1.38                | 0.11        |
| MP3~TLEB_APR_MAY+NAO_APR_MAY+PSAH_NOV_MAR+SCAND_JUN_JUL_1y                            | 5        | 94.31        | 1.62                | 0.09        |
| MP3~TLEB_APR_MAY+NAO_APR_MAY+NAO_JUN_JUL_1y+NAO_NOV_MAR+PSAH_NOV_MAR+SCAND_JUN_JUL_1y | 7        | 94.43        | 1.74                | 0.09        |
| MP3~NAO_APR_MAY+NAO_NOV_MAR                                                           | 4        | 94.56        | 1.87                | 0.08        |

**Table S12. Model selection procedure by “all subsets”, according to AICc, from the full model (Table S8) of the relationship between 15 climate variables and the year, and timing of migration for the whole spring (AA) for Willow Warblers caught at Bukowo, Poland, in 1982–2017.** The table presents all models with  $\Delta\text{AICc} < 2$ . The models were ranked by corrected Akaike’s Information Criteria for small samples size (AICc),  $k$  is the number of estimated parameters in the model,  $\Delta\text{AICc}$  gives the difference in AICc from the model with lowest AICc,  $w_i$  is the Akaike weight. The best model, discussed in the text, in **bold** face. Model selection with the package MuMIn 1.43.6 (Bartoń, 2020) in R 4.0.3 (R Core Team, 2020). Abbreviations of variables as in Tables 1 and 2.

| Model formula                                                                                                    | $k$      | AICc         | $\Delta\text{AICc}$ | $W_i$       |
|------------------------------------------------------------------------------------------------------------------|----------|--------------|---------------------|-------------|
| <b>AA~IOD_AUG_OCT_1y+TLEB_APR_MAY+NAO_APR_MAY+NAO_NOV_MAR+SCAND_JUN_JUL_1y+SOI_AUG_OCT_1y+TSAH_NOV_MAR</b>       | <b>8</b> | <b>78.82</b> | <b>0.00</b>         | <b>0.29</b> |
| AA~IOD_AUG_OCT_1y+TLEB_APR_MAY+NAO_APR_MAY+NAO_NOV_MAR+SCAND_JUN_JUL_1y+SOI_NOV_MAR+TSAH_NOV_MAR                 | 8        | 78.82        | 0.00                | 0.29        |
| AA~IOD_AUG_OCT_1y+TLEB_APR_MAY+NAO_APR_MAY+NAO_NOV_MAR+PSAH_NOV_MAR+SCAND_JUN_JUL_1y+SOI_AUG_OCT_1y+TSAH_NOV_MAR | 9        | 80.25        | 1.43                | 0.14        |
| AA~IOD_AUG_OCT_1y+TLEB_APR_MAY+NAO_APR_MAY+NAO_NOV_MAR+PSAH_NOV_MAR+SCAND_JUN_JUL_1y+SOI_AUG_OCT_1y              | 8        | 80.37        | 1.55                | 0.14        |
| AA~IOD_AUG_OCT_1y+NAO_APR_MAY+NAO_NOV_MAR+SCAND_JUN_JUL_1y+SOI_NOV_MAR+TSAH_NOV_MAR                              | 7        | 80.46        | 1.64                | 0.13        |

**Table S13. Contributions of each explanatory variable to the top multiple regression models ( $\Delta AICc < 2$ ) of the relationship between 15 climate variables and the year, and the timing of migration in three main periods of spring (MP1, MP2, MP3) and over the whole season (AA) for Willow Warblers caught at Bukowo, Poland, in 1982–2017.** The contribution of each variable was calculated as the sum of the Akaike weights ( $w_i$ ) of the top models that include this variable (Tables S6–S9). If the variable occurs in all the top models, its contribution = 100%; if it occurs in none of the top models, its contribution = 0%. The nine climate variables selected by the best models and analysed further are marked in **bold**. SOI Aug–Oct\_1y and SOI Nov–March were strongly correlated (Table S3), and never occurred in the same model (Tables S6–S9). To avoid strong multicollinearity we therefore chose only SOI Aug–Oct\_1y for further analyses, because it had a greater sum of contributions in the top models for the three main periods.

| No | Explanatory variable    | Contributions to top models |      |     | Sum for three main periods |
|----|-------------------------|-----------------------------|------|-----|----------------------------|
|    |                         | MP1                         | MP2  | MP3 |                            |
| 1  | <b>NAO Apr–May</b>      | 100%                        | 100% | 48% | <b>248%</b>                |
| 2  | <b>IOD Aug–Oct_1y</b>   | 100%                        | 100% | 0%  | <b>200%</b>                |
| 3  | <b>SCAND Jun–Jul_1y</b> | 18%                         | 100% | 70% | <b>188%</b>                |
| 4  | <b>NAO Nov–Mar</b>      | 50%                         | 40%  | 91% | <b>180%</b>                |
| 5  | <b>TLEB Apr–May</b>     | 0%                          | 100% | 58% | <b>158%</b>                |
| 6  | <b>PSAH Nov–Mar</b>     | 53%                         | 24%  | 81% | <b>158%</b>                |
| 7  | <b>SAH Aug–Oct_1y</b>   | 67%                         | 71%  | 0%  | <b>138%</b>                |
| 8  | <b>SOI Aug–Oct_1y</b>   | 82%                         | 10%  | 0%  | <b>92%</b>                 |
| 9  | SOI Nov_Mar             | 67%                         | 9%   | 0%  | 76%                        |
| 10 | <b>TSAH Aug–Oct_1y</b>  | 33%                         | 28%  | 0%  | <b>61%</b>                 |
| 11 | TSAH Nov–Mar            | 0%                          | 40%  | 19% | 59%                        |
| 12 | NAO Jun–Jul_1y          | 0%                          | 0%   | 9%  | 9%                         |
| 13 | IOD Nov–Mar             | 0%                          | 7%   | 0%  | 7%                         |
| 14 | PSAH Aug–Oct_1y         | 0%                          | 0%   | 0%  | 0%                         |
| 15 | SCAND Apr–May           | 0%                          | 0%   | 0%  | 0%                         |
| 16 | YearN                   | 0%                          | 0%   | 0%  | 0%                         |

**Table S14. Relationships between nine overlapping sub-periods in the Annual Anomaly for the timing of Willow Warblers' spring migration at Bukowo, Poland, in 1982–2017 and nine selected climate variables.** Estimate – coefficients from multiple regression; SE – standard error of the estimates;  $t$ ,  $p$  –  $t$ -test and significance of each estimate,  $p < 0.05$  in **bold**,  $0.05 < p < 0.1$  in **bold italics**; VIF – variance inflation factor,  $R^2$  – partial determination coefficients,  $pR$  – partial correlation coefficient. Abbreviations of variables as in Tables 1 and 2.

| Explanatory variable | Estimate                                                        | SE   | $t$   | $p$          | VIF  | $R^2$ | $pR$         |
|----------------------|-----------------------------------------------------------------|------|-------|--------------|------|-------|--------------|
| <b>SP1</b>           | Model statistics: $F_{9,25} = 4.46$ , $\text{Adj}R^2 = 47.8\%$  |      |       |              |      |       |              |
| TLEB_APR_MAY         | -0.04                                                           | 0.15 | -0.25 | 0.801        | 1.48 | 0.00  | -0.05        |
| NAO_APR_MAY          | -0.25                                                           | 0.13 | -1.90 | <b>0.069</b> | 1.14 | 0.13  | <b>-0.36</b> |
| NAO_NOV_MAR          | -0.26                                                           | 0.14 | -1.90 | <b>0.069</b> | 1.25 | 0.13  | <b>-0.36</b> |
| PSAH_NOV_MAR         | -0.13                                                           | 0.13 | -1.02 | 0.317        | 1.10 | 0.04  | -0.20        |
| SOI_AUG_OCT_1y       | -0.62                                                           | 0.17 | -3.60 | <b>0.001</b> | 1.95 | 0.34  | <b>-0.58</b> |
| IOD_AUG_OCT_1y       | -0.56                                                           | 0.18 | -3.07 | <b>0.005</b> | 2.18 | 0.27  | <b>-0.52</b> |
| PSAH_AUG_OCT_1y      | -0.29                                                           | 0.16 | -1.84 | <b>0.077</b> | 1.58 | 0.12  | <b>-0.35</b> |
| TSAH_AUG_OCT_1y      | -0.30                                                           | 0.15 | -2.01 | <b>0.055</b> | 1.44 | 0.14  | <b>-0.37</b> |
| SCAND_JUN_JUL_1y     | -0.19                                                           | 0.15 | -1.26 | 0.220        | 1.46 | 0.06  | -0.24        |
| <b>SP2</b>           | Model statistics: $F_{9,25} = 4.85$ , $\text{Adj}R^2 = 50.5\%$  |      |       |              |      |       |              |
| TLEB_APR_MAY         | -0.04                                                           | 0.15 | -0.25 | 0.804        | 1.48 | 0.00  | -0.05        |
| NAO_APR_MAY          | -0.28                                                           | 0.13 | -2.20 | <b>0.037</b> | 1.14 | 0.16  | <b>-0.40</b> |
| NAO_NOV_MAR          | -0.23                                                           | 0.13 | -1.73 | <b>0.095</b> | 1.25 | 0.11  | <b>-0.33</b> |
| PSAH_NOV_MAR         | -0.11                                                           | 0.13 | -0.86 | 0.401        | 1.10 | 0.03  | -0.17        |
| SOI_AUG_OCT_1y       | -0.51                                                           | 0.17 | -3.00 | <b>0.006</b> | 1.95 | 0.26  | <b>-0.51</b> |
| IOD_AUG_OCT_1y       | -0.51                                                           | 0.18 | -2.88 | <b>0.008</b> | 2.18 | 0.25  | <b>-0.50</b> |
| PSAH_AUG_OCT_1y      | -0.37                                                           | 0.15 | -2.41 | <b>0.023</b> | 1.58 | 0.19  | <b>-0.43</b> |
| TSAH_AUG_OCT_1y      | -0.32                                                           | 0.14 | -2.21 | <b>0.037</b> | 1.44 | 0.16  | <b>-0.40</b> |
| SCAND_JUN_JUL_1y     | -0.25                                                           | 0.15 | -1.71 | 0.100        | 1.46 | 0.10  | -0.32        |
| <b>SP3</b>           | Model statistics: $F_{9,25} = 8.67$ , $\text{Adj}R^2 = 67.0\%$  |      |       |              |      |       |              |
| TLEB_APR_MAY         | -0.28                                                           | 0.12 | -2.36 | <b>0.026</b> | 1.48 | 0.18  | <b>-0.43</b> |
| NAO_APR_MAY          | -0.40                                                           | 0.11 | -3.75 | <b>0.001</b> | 1.14 | 0.36  | <b>-0.60</b> |
| NAO_NOV_MAR          | -0.14                                                           | 0.11 | -1.27 | 0.215        | 1.25 | 0.06  | -0.25        |
| PSAH_NOV_MAR         | -0.10                                                           | 0.10 | -0.94 | 0.358        | 1.10 | 0.03  | -0.18        |
| SOI_AUG_OCT_1y       | -0.29                                                           | 0.14 | -2.12 | <b>0.044</b> | 1.95 | 0.15  | <b>-0.39</b> |
| IOD_AUG_OCT_1y       | -0.40                                                           | 0.15 | -2.78 | <b>0.010</b> | 2.18 | 0.24  | <b>-0.49</b> |
| PSAH_AUG_OCT_1y      | -0.38                                                           | 0.12 | -3.04 | <b>0.005</b> | 1.58 | 0.27  | <b>-0.52</b> |
| TSAH_AUG_OCT_1y      | -0.29                                                           | 0.12 | -2.50 | <b>0.019</b> | 1.44 | 0.20  | <b>-0.45</b> |
| SCAND_JUN_JUL_1y     | -0.50                                                           | 0.12 | -4.20 | <b>0.000</b> | 1.46 | 0.41  | <b>-0.64</b> |
| <b>SP4</b>           | Model statistics: $F_{9,25} = 10.13$ , $\text{Adj}R^2 = 70.7\%$ |      |       |              |      |       |              |
| TLEB_APR_MAY         | -0.41                                                           | 0.11 | -3.59 | <b>0.001</b> | 1.48 | 0.34  | <b>-0.58</b> |
| NAO_APR_MAY          | -0.47                                                           | 0.10 | -4.72 | <b>0.000</b> | 1.14 | 0.47  | <b>-0.69</b> |
| NAO_NOV_MAR          | -0.13                                                           | 0.10 | -1.22 | 0.232        | 1.25 | 0.06  | -0.24        |
| PSAH_NOV_MAR         | -0.10                                                           | 0.10 | -1.07 | 0.294        | 1.10 | 0.04  | -0.21        |
| SOI_AUG_OCT_1y       | -0.19                                                           | 0.13 | -1.45 | 0.160        | 1.95 | 0.08  | -0.28        |
| IOD_AUG_OCT_1y       | -0.37                                                           | 0.14 | -2.74 | <b>0.011</b> | 2.18 | 0.23  | <b>-0.48</b> |
| PSAH_AUG_OCT_1y      | -0.31                                                           | 0.12 | -2.66 | <b>0.014</b> | 1.58 | 0.22  | <b>-0.47</b> |
| TSAH_AUG_OCT_1y      | -0.22                                                           | 0.11 | -2.01 | <b>0.056</b> | 1.44 | 0.14  | <b>-0.37</b> |
| SCAND_JUN_JUL_1y     | -0.52                                                           | 0.11 | -4.64 | <b>0.000</b> | 1.46 | 0.46  | <b>-0.68</b> |

**Table S14. continued**

| Explanatory variable    | Estimate                                                       | SE   | <i>T</i> | <i>p</i>     | VIF  | <i>R</i> <sup>2</sup> | <i>pR</i>    |
|-------------------------|----------------------------------------------------------------|------|----------|--------------|------|-----------------------|--------------|
| <b>SP5</b>              | Model statistics: $F_{9,25} = 8.35$ , $\text{Adj}R^2 = 66.0\%$ |      |          |              |      |                       |              |
| <b>TLEB_APR_MAY</b>     | -0.44                                                          | 0.12 | -3.60    | <b>0.001</b> | 1.48 | 0.34                  | <b>-0.58</b> |
| <b>NAO_APR_MAY</b>      | -0.48                                                          | 0.11 | -4.46    | <b>0.000</b> | 1.14 | 0.44                  | <b>-0.67</b> |
| NAO_NOV_MAR             | -0.14                                                          | 0.11 | -1.24    | 0.228        | 1.25 | 0.06                  | -0.24        |
| PSAH_NOV_MAR            | -0.15                                                          | 0.10 | -1.46    | 0.157        | 1.10 | 0.08                  | -0.28        |
| SOI_AUG_OCT_1y          | -0.16                                                          | 0.14 | -1.14    | 0.266        | 1.95 | 0.05                  | -0.22        |
| <b>IOD_AUG_OCT_1y</b>   | -0.40                                                          | 0.15 | -2.71    | <b>0.012</b> | 2.18 | 0.23                  | <b>-0.48</b> |
| <b>PSAH_AUG_OCT_1y</b>  | -0.23                                                          | 0.13 | -1.82    | <b>0.081</b> | 1.58 | 0.12                  | <b>-0.34</b> |
| TSAH_AUG_OCT_1y         | -0.16                                                          | 0.12 | -1.30    | 0.205        | 1.44 | 0.06                  | -0.25        |
| <b>SCAND JUN JUL 1y</b> | -0.48                                                          | 0.12 | -4.00    | <b>0.001</b> | 1.46 | 0.39                  | <b>-0.62</b> |
| <b>SP6</b>              | Model statistics: $F_{9,25} = 6.32$ , $\text{Adj}R^2 = 58.5\%$ |      |          |              |      |                       |              |
| <b>TLEB_APR_MAY</b>     | -0.43                                                          | 0.13 | -3.21    | <b>0.004</b> | 1.48 | 0.29                  | <b>-0.54</b> |
| <b>NAO_APR_MAY</b>      | -0.47                                                          | 0.12 | -3.99    | <b>0.001</b> | 1.14 | 0.39                  | <b>-0.62</b> |
| NAO_NOV_MAR             | -0.19                                                          | 0.12 | -1.53    | 0.139        | 1.25 | 0.09                  | -0.29        |
| <b>PSAH_NOV_MAR</b>     | -0.26                                                          | 0.12 | -2.22    | <b>0.035</b> | 1.10 | 0.17                  | <b>-0.41</b> |
| SOI_AUG_OCT_1y          | -0.13                                                          | 0.15 | -0.85    | 0.403        | 1.95 | 0.03                  | -0.17        |
| <b>IOD_AUG_OCT_1y</b>   | -0.41                                                          | 0.16 | -2.50    | <b>0.019</b> | 2.18 | 0.20                  | <b>-0.45</b> |
| PSAH_AUG_OCT_1y         | -0.07                                                          | 0.14 | -0.54    | 0.594        | 1.58 | 0.01                  | -0.11        |
| TSAH_AUG_OCT_1y         | -0.10                                                          | 0.13 | -0.75    | 0.460        | 1.44 | 0.02                  | -0.15        |
| <b>SCAND JUN JUL 1y</b> | -0.46                                                          | 0.13 | -3.46    | <b>0.002</b> | 1.46 | 0.32                  | <b>-0.57</b> |
| <b>SP7</b>              | Model statistics: $F_{9,25} = 3.21$ , $\text{Adj}R^2 = 36.9\%$ |      |          |              |      |                       |              |
| <b>TLEB_APR_MAY</b>     | -0.41                                                          | 0.17 | -2.46    | <b>0.021</b> | 1.48 | 0.19                  | <b>-0.44</b> |
| <b>NAO_APR_MAY</b>      | -0.38                                                          | 0.15 | -2.60    | <b>0.015</b> | 1.14 | 0.21                  | <b>-0.46</b> |
| <b>NAO_NOV_MAR</b>      | -0.28                                                          | 0.15 | -1.81    | <b>0.082</b> | 1.25 | 0.12                  | <b>-0.34</b> |
| <b>PSAH_NOV_MAR</b>     | -0.30                                                          | 0.14 | -2.13    | <b>0.043</b> | 1.10 | 0.15                  | <b>-0.39</b> |
| SOI_AUG_OCT_1y          | -0.02                                                          | 0.19 | -0.11    | 0.915        | 1.95 | 0.00                  | -0.02        |
| IOD_AUG_OCT_1y          | -0.24                                                          | 0.20 | -1.17    | 0.252        | 2.18 | 0.05                  | -0.23        |
| PSAH_AUG_OCT_1y         | 0.06                                                           | 0.17 | 0.33     | 0.743        | 1.58 | 0.00                  | 0.07         |
| TSAH_AUG_OCT_1y         | -0.01                                                          | 0.16 | -0.06    | 0.954        | 1.44 | 0.00                  | -0.01        |
| <b>SCAND JUN JUL 1y</b> | -0.41                                                          | 0.16 | -2.51    | <b>0.019</b> | 1.46 | 0.20                  | <b>-0.45</b> |
| <b>SP8</b>              | Model statistics: $F_{9,25} = 1.84$ , $\text{Adj}R^2 = 18.3\%$ |      |          |              |      |                       |              |
| TLEB_APR_MAY            | -0.30                                                          | 0.19 | -1.61    | 0.120        | 1.48 | 0.09                  | -0.31        |
| NAO_APR_MAY             | -0.28                                                          | 0.17 | -1.70    | 0.102        | 1.14 | 0.10                  | -0.32        |
| NAO_NOV_MAR             | -0.29                                                          | 0.17 | -1.67    | 0.108        | 1.25 | 0.10                  | -0.32        |
| <b>PSAH_NOV_MAR</b>     | -0.33                                                          | 0.16 | -2.03    | <b>0.053</b> | 1.10 | 0.14                  | <b>-0.38</b> |
| SOI_AUG_OCT_1y          | 0.01                                                           | 0.22 | 0.05     | 0.960        | 1.95 | 0.00                  | 0.01         |
| IOD_AUG_OCT_1y          | -0.13                                                          | 0.23 | -0.55    | 0.586        | 2.18 | 0.01                  | -0.11        |
| PSAH_AUG_OCT_1y         | 0.04                                                           | 0.20 | 0.21     | 0.836        | 1.58 | 0.00                  | 0.04         |
| TSAH_AUG_OCT_1y         | -0.05                                                          | 0.19 | -0.27    | 0.792        | 1.44 | 0.00                  | -0.05        |
| <b>SCAND JUN JUL 1y</b> | -0.35                                                          | 0.19 | -1.87    | <b>0.074</b> | 1.46 | 0.12                  | <b>-0.35</b> |
| <b>SP9</b>              | Model statistics: $F_{9,25} = 1.28$ , $\text{Adj}R^2 = 0.7\%$  |      |          |              |      |                       |              |
| TLEB_APR_MAY            | -0.15                                                          | 0.20 | -0.75    | 0.462        | 1.48 | 0.02                  | -0.15        |
| NAO_APR_MAY             | -0.16                                                          | 0.18 | -0.89    | 0.381        | 1.14 | 0.03                  | -0.18        |
| NAO_NOV_MAR             | -0.22                                                          | 0.18 | -1.20    | 0.241        | 1.25 | 0.05                  | -0.23        |
| <b>PSAH_NOV_MAR</b>     | -0.41                                                          | 0.17 | -2.36    | <b>0.027</b> | 1.10 | 0.18                  | <b>-0.43</b> |
| SOI_AUG_OCT_1y          | 0.01                                                           | 0.23 | 0.06     | 0.953        | 1.95 | 0.00                  | 0.01         |
| IOD_AUG_OCT_1y          | -0.09                                                          | 0.24 | -0.37    | 0.717        | 2.18 | 0.01                  | -0.07        |
| PSAH_AUG_OCT_1y         | -0.06                                                          | 0.21 | -0.26    | 0.793        | 1.58 | 0.00                  | -0.05        |
| TSAH_AUG_OCT_1y         | -0.05                                                          | 0.20 | -0.27    | 0.788        | 1.44 | 0.00                  | -0.05        |
| SCAND JUN JUL 1y        | -0.29                                                          | 0.20 | -1.46    | 0.158        | 1.46 | 0.08                  | -0.28        |

**Table S15. Partial correlation coefficients for each of nine selected climate variables (Table 1) in multiple regression models with the response variable as each of nine overlapping sub-periods of the Annual Anomaly (AA) for the timing of Willow Warblers' spring migration at Bukowo, Poland, in 1982–2017.** The partial correlation coefficients are the same as in the last column of Table S14, compiled for the sub-periods of AA. This is the source data for Fig. 4A–I, but in those figures the signs of the correlations were inverted to better visualise the change in relationships with the progress of passage.

| Symbols of sub-periods                         | SP1      | SP2       | SP3       | SP4             | SP5             | SP6     | SP7     | SP8      | SP9      |
|------------------------------------------------|----------|-----------|-----------|-----------------|-----------------|---------|---------|----------|----------|
| Percentiles at multiyear curve for sub-periods | 0–20%    | 11–30%    | 21–40%    | 31–50%          | 41–60%          | 51–70%  | 61–80%  | 71–90%   | 81–100%  |
| Dates of sub-periods/<br>Climate variable      | 1–22 Apr | 18–26 Apr | 23–28 Apr | 26Apr–<br>1 May | 29Apr–<br>3 May | 2–5 May | 4–8 May | 6–11 May | 9–15 May |
| TLEB_APR_MAY                                   | –0.05    | –0.05     | –0.43     | –0.58           | –0.58           | –0.54   | –0.44   | –0.31    | –0.15    |
| NAO_APR_MAY                                    | –0.36    | –0.40     | –0.60     | –0.69           | –0.67           | –0.62   | –0.46   | –0.32    | –0.18    |
| NAO_NOV_MAR                                    | –0.36    | –0.33     | –0.25     | –0.24           | –0.24           | –0.29   | –0.34   | –0.32    | –0.23    |
| PSAH_NOV_MAR                                   | –0.20    | –0.17     | –0.18     | –0.21           | –0.28           | –0.41   | –0.39   | –0.38    | –0.43    |
| SOI_AUG_OCT_1y                                 | –0.58    | –0.51     | –0.39     | –0.28           | –0.22           | –0.17   | –0.02   | 0.01     | 0.01     |
| IOD_AUG_OCT_1y                                 | –0.52    | –0.50     | –0.49     | –0.48           | –0.48           | –0.45   | –0.23   | –0.11    | –0.07    |
| PSAH_AUG_OCT_1y                                | –0.35    | –0.43     | –0.52     | –0.47           | –0.34           | –0.11   | 0.07    | 0.04     | –0.05    |
| TSAH_AUG_OCT_1y                                | –0.37    | –0.40     | –0.45     | –0.37           | –0.25           | –0.15   | –0.01   | –0.05    | –0.05    |
| SCAND_JUN_JUL_1y                               | –0.24    | –0.32     | –0.64     | –0.68           | –0.62           | –0.57   | –0.45   | –0.35    | –0.28    |

**Table S16. Summary statistics for linear regressions of Annual Anomaly in spring migration timing for three main periods and for the whole spring season with the count of juvenile Willow Warblers caught the previous autumn (Njuv\_1y) at Bukowo, Poland, in 1982–2017.** The exceptionally high Njuv in autumn 1982 was excluded from this analysis as an outlier.  $\beta$  slope = regression coefficient; SE = Standard Error;  $R^2$  – determination coefficient;  $t$ ,  $p$  = results of two-sided  $t$ -test, significant regressions after Benjamini-Hochberg correction for multiple comparisons marked in **bold** face. These regressions are plotted in Fig. 5.

| Dependent variable | $\beta$ slope | SE   | $R^2$ | $t_{34}$ | $p$          |
|--------------------|---------------|------|-------|----------|--------------|
| MP1                | <b>0.45</b>   | 0.16 | 0.21  | 2.85     | <b>0.008</b> |
| MP2                | <b>0.55</b>   | 0.15 | 0.31  | 3.66     | <b>0.001</b> |
| MP3                | 0.34          | 0.17 | 0.12  | 1.97     | 0.058        |
| AA                 | <b>0.53</b>   | 0.15 | 0.29  | 3.47     | <b>0.002</b> |

## REFERENCES

- Bartoń K. 2019. Package ‘MuMIn’. Multi-Model Inference. Available at <https://cran.r-project.org/web/packages/MuMIn/MuMIn.pdf>. (accessed November 20, 2019).
- Benjamini Y., Hochberg Y. 1995. Controlling the false discovery rate: a practical and powerful approach to multiple testing. *Journal of the Royal Statistical Society, Series B* 57 (1): 289–300.
- Crawley MJ. 2013. *The R Book*. Chichester. England: John Wiley & Sons.
- R Core Team. 2020. R: a language and environment for statistical computing. Available at <https://www.r-project.org> (accessed February 5, 2021).
